# Supplementary material for: Partisans Overestimate Their Side’s Intolerance
Source: Research Square preprint supplement (doi:10.21203/rs.3.rs-7579935/v1), 2025-09-23
Supplement: Supplementary file 1 [file f3eb22af3c24e9bde0b9fb6d.docx]

Supplementary Information for “Partisans Overestimate Their Side’s Intolerance”

This file includes: **Sample demographics**, **Measures & survey instructions**, **Supplementary Analyses A-B, Figure S1,** and **Tables S1** to **S7**

**Participant demographics and exclusion criteria**

Study 1a. Participants were recruited from Connect, a panel offered by Cloud Research. We excluded participants who did not identify as a Democrat or Republican or who failed our attention checks. 55 participants were excluded due to these criteria. The final sample size was 846 participants (56% Democrat, 44% Republican; 50% female, Mage = 43.4, 78% White, 11% Black, 5% Asian, 5% Hispanic, and 1% Other).

Study 1b. Participants were recruited from a panel of ForthRight participants from Bovitz, Inc. We excluded participants who did not identify as a Democrat or Republican or who failed our attention checks. 341 participants were excluded due to these criteria. The final sample size was 1,103 participants (52% Democrat, 48% Republican; 53% female, Mage = 49.6, 69% White, 13% Black, 5% Asian, 9.5% Hispanic, and 3.5% other).

Study 2a. Participants were recruited from an introductory-level undergraduate class at Stanford. We excluded participants who reported not being in the class, or who didn’t complete either of our two primary measures. 11 participants were excluded due to these criteria. The final sample size was 460 (51% female; 39% White, 7% Black, 30% Asian, 12% Hispanic, and 13% Other or didn’t say; 82% identified as liberal or centrist, Mideology = 3.02, where 1 = “Extremely liberal” and 7 = “Extremely conservative”).

Study 2b. Participants were recruited from an introductory-level undergraduate class at Stanford. We excluded participants who didn’t complete either of our two primary measures. 64 participants were excluded due to this criterion. The final sample size was 2,356 (61% female; 18% White, 6.5% Black, 35% Asian, 12% Hispanic, 22% Multiple races, and 6% Other; 91% identified as liberal or centrist, Mideology = 2.77, where 1 = “Extremely liberal” and 7 = “Extremely conservative”).

Study 3. Participants were recruited from a panel of ForthRight participants from Bovitz, Inc. Among our targeted subsample of over-estimators (OEs), we excluded participants who did not identify as a Democrat or Republican or who failed our attention checks. 9 participants were excluded due to these criteria. The final sample size was 805 participants (48% Democrat, 52% Republican; 55% female, Mage = 48.3, 71% White, 3.5% Black, 11.5% Asian, 11% Hispanic, and 3% Other).

Study 4. Participants were recruited from Connect, a panel offered by Cloud Research. We excluded participants who did not identify as a Democrat or Republican or who failed our attention checks. 142 participants were excluded due to these criteria. The final sample size was 1,512 participants (50% Democrat, 50% Republican; 62% female, Mage = 40.7). We did not collect race.

**Measures and Survey Instructions**

All items and procedures were approved by the Stanford IRB, protocol #53566.

Any variables that aren’t listed below are either included directly in the paper, or in the complete survey materials posted on OSF.

Wherever applicable, {co-partisan}, {out-partisan}, {in-party}, and {out-party} were replaced by the appropriate cognate of Democrat or Republican in the actual survey.

**1. Political beliefs: first-order / self**

Political intolerance – Studies 1a, 1b, 3, and 4

Would you like it or dislike it if the Democratic and Republican parties cooperated more, even if that meant compromising on some important issues? *Likert-style scale from Like a great deal (1) to Dislike a great deal (7)*

Think about a political issue you care about. How likely or unlikely would you be to support a policy that makes progress on this issue if the policy also supported some {Out-party} initiatives? *Likert-style scale from Extremely likely (1) to Extremely unlikely (7)*

How comfortable or uncomfortable are you having close personal friends who are {Out-partisans}? *Likert-style scale from Extremely comfortable (1) to Extremely uncomfortable (7)*

How acceptable or unacceptable do you think it is for {Co-partisans} to obtain political information from sources that lean toward the {Out-party} Party? (e.g., {Rachel Maddow, Mother Jones, the Huffington Post}/{the Megyn Kelly Show, Fox News, the Washington Times}) *Likert-style scale from Extremely acceptable (1) to Extremely unacceptable (7)*

Imagine learning that someone you know frequently seeks out news from {Out-party}-leaning sources, in addition to {In-party}-leaning sources. Compared to before you learned this, would you view this person better, worse, or just the same? *Likert-style scale from Much better (1) to Much worse (7)*

Subversive tactics, i.e., undemocratic actions and political violence – Studies 1a, 1b, and 4

{In-party} governors should ignore unfavorable court rulings by {Out-party}-appointed judges.

{In-party} governors should reduce the number of polling stations in areas that support {Out-partisans}s.

It is justified for {Co-partisans} to use violence in advancing the group's political goals these days.

It is justified for {Co-partisans} to send threatening and intimidating messages to {Out-party} party leaders.

Restricting out-party speech – Studies 1a, 1b, and 4

The expression of some offensive {Out-party} views should not be allowed (e.g., at rallies, speeches, protests).

Some extreme {Out-party} views should be prohibited from being part of public discourse.

Policy extremity [[1]](#footnote-1),[[2]](#footnote-2) – Studies 1a, 1b, and 4

Do you favor or oppose banning the sale of semi-automatic assault-style rifles? *Likert-style scale from Favor a great deal (1) to Oppose a great deal (7)*

Do you favor or oppose prohibiting medication abortions (that is, prohibiting the use of prescription pills to end pregnancies)? *Likert-style scale from Favor a great deal (1) to Oppose a great deal (7)*

Do you favor or oppose returning unauthorized immigrants to their native countries? *Likert-style scale from Favor a great deal (1) to Oppose a great deal (7)*

*Study 1a only:* Do you favor or oppose increased government regulation on businesses that produce a great deal of greenhouse emissions linked to climate change? *Likert-style scale from Favor a great deal (1) to Oppose a great deal (7)*

*Study 1b and 4 only:* Do you favor or oppose increasing government spending to help people pay for health insurance when they can’t pay for it all themselves? *Likert-style scale from Favor a great deal (1) to Oppose a great deal (7)*

*Study 4 only:* Do you favor or oppose making it a top legislative priority to defend the country from future terrorist attacks? *Likert-style scale from Favor a great deal (1) to Oppose a great deal (7)*

**2. Second-order / ingroup estimates (Study 1a, 1b, 3, and 4)**

The item wording for second-order estimates was identical to first-order estimates.

The scale anchors, however, took the form of sliders instead of radio buttons. The sliders allowed participants to enter any number between 1-7 with two decimal places. This better suited the task of approximating an *average* value. This also allowed participants to be relatively precise (and therefore, feasibly accurate).

Participants were provided different instructions, as described below.

Study 1a, 1b, and 4

Before answering questions about their co-partisans, participants saw:

*On the next few pages, we want you to* ***estimate the average response among {co-partisans}*** *to several questions. Please estimate as accurately as you can.*

*For all questions in this section, we are interested in what you think members of the public believe, on average, not elected officials.*

On the following page, they were reminded about the task:

*Please indicate what you guess would be the* ***average response among {co-partisans}*** *to each of the statements below. Please estimate as accurately as you can.*

Finally, for each question, the following text would proceed the answer choices:

*The average response among {co-partisans} would be...*

Study 3

The survey instructions were very similar, with a few updates for clarity. A Republican would have seen this:

*The next part of the survey will ask you to provide your best guesses about the beliefs of others.*

*Specifically, we want you to imagine how Republicans would respond to the questions on the next few pages. Please estimate what you think would be the average response among Republicans as accurately as you can.*

*For all questions in this section, we are interested in what you think members of the public believe, not elected officials.*

**3. Study 2a and 2b: Disallowing right-wing speakers to speak on campus**

The full instructions and item text for Studies 2a and 2b are below.

Study 2a

Recently there have been discussions and debate around whether or not far-right speakers should be allowed to give talks on college campuses. You may have heard about this regarding speakers like Richard Spencer, Milo Yiannopoulos, Ann Coulter, and others.

Where do you fall on this issue with regard to Stanford? Do you think far-right speakers such as these should – or should not - be allowed to speak on the Stanford campus? Please indicate your opinion using the scale below.

*Likert-style scale from Strongly oppose allowing them to speak (1) to Strongly support allowing them to speak (7)*

Now we are curious about your perceptions of the views of other students in your Social Psychology course. Using the same scale as before, how do you think the average student in your course will answer the same question you just answered?  FOR THE QUESTION, "To what extent do you believe far-right speakers such as these should – or should not - be allowed to speak on the Stanford campus?” THE AVERAGE STUDENT IN MY SOCIAL PSYCHOLOGY COURSE WILL ANSWER:

*Likert-style scale from Strongly oppose allowing them to speak (1) to Strongly support allowing them to speak (7)*

Study 2b

Recently there have been discussions and debate around whether or not far-right speakers should be allowed to give talks on college campuses. Where do you fall on this issue with regard to Stanford? Do you think far-right speakers such as these should – or should not - be allowed to speak on the Stanford campus? Please answer on a scale from 1 (“Strongly support allowing”) to 5 (“Strongly oppose allowing”)

*Likert-style scale as described.*

Now we are curious about your perceptions of the views of other students at Stanford. How do you think the average Stanford student will answer the same question you just answered? Please answer on a scale from 1 (“Strongly support allowing”) to 5 (“Strongly oppose allowing”)

*Likert-style scale as described.*

**4. Survey procedure for the opinion-sharing paradigm (Study 4)**

Participants first provided their self-reports and co-partisan estimates across all the political opinions listed in sections 2 and 3, above. The opinion-sharing paradigm followed:

Page 1

In the next section, we want to take a deep dive into your thoughts on a particular issue. This section will be more interactive.

Page 2

Earlier in this survey, we asked you for your response to the following:

*{We repeated a question randomly drawn from earlier in the survey, e.g., “Do you favor or oppose prohibiting medication abortions (that is, prohibiting the use of prescription pills to end pregnancies)?”}*

Now, please describe your opinion in detail. What do you believe about this, and why? Please write as much as you need to fully capture your opinion(s) on this topic.

*{Open-ended text box}*

Page 3

*Public condition – Social media[[3]](#footnote-3):* Now, take a few moments to imagine that you see this topic has come up in conversation on your social media feed. Close your eyes and really try to imagine this scene vividly. You can proceed after 10 seconds.

*Public condition – Neighbors & coworkers[[4]](#footnote-4):* Now, take a few moments to imagine that this topic has come up in conversation among a group of neighbors or coworkers. Close your eyes and really try to imagine this scene vividly. You can proceed after 10 seconds.

*Private condition – Anonymous poll:* Now, take a few moments moment to imagine that this question has come up on an anonymous, national opinion poll. Close your eyes and really try to imagine this vividly. You can proceed after 10 seconds.

Page 4

First, we'd like to know how you would feel if you shared the opinion you wrote {on your social media feed}/{among some coworkers or neighbors}/{on an anonymous national opinion poll}.

As a reminder, here's what you said when we asked *{… here we pipe-in an abbreviated version of the question, such as, “what you thought about banning prohibiting medication abortions”}:*

“*{participant’s open-ended response from Page 2}*”

What kinds of emotions would you feel if you shared your opinion above {on your social media feed}/{among some coworkers or neighbors}/{on an anonymous national opinion poll}?[[5]](#footnote-5)

*In random order:* Interested, Distressed, Strong, Excited, Nervous, Afraid, Proud, Judged, Enthusiastic, Jittery

*From Not at all (1) to Extremely (5)*

Page 5

Now we're curious what you think you would do in this scenario. As a reminder, here's what you said when we asked *{abbreviated version of question, see above}:*

“*{participant’s open-ended response from Page 2}*”

If you had the opportunity to share this opinion {on your social media feed}/{among some coworkers or neighbors}/{on an anonymous national opinion poll}, would you?[[6]](#footnote-6)

*Response options: “Yes” and “No”*

How *likely* would you be to share this opinion {on your social media feed}/{among some coworkers or neighbors}/{on an anonymous national opinion poll}?[[7]](#footnote-7)

*Likert-style response options, from Definitely would not (1) to Definitely would (6)*

Page 6

You said you probably {would / would not} share your opinion. Can you say more about {why / why not}?

*Open-ended text box.*

Page 7

Thanks! For the purposes of the next few questions, we will ask some follow-ups about your original statements.

To remind you, here's what you wrote:

“*{participant’s open-ended response from Page 2}”*

How much do you think {co-partisans}, on average, would support or oppose your opinion? [[8]](#footnote-8)

*Likert-style response options, from Completely support (1) to Completely oppose (7)*

**Supplemental Analysis A**

For consistency across Study 1a and 1b, and aligned with Study 1b’s pre-registration, we calculated our main misperception effect by doing a t-test across an aggregate of each of the 15 items we measured (first-order vs. second-order).

However, because we found clear differences in misperceptions across the category of beliefs – and there are different numbers of items in each category -- we believe that it is more representative and conservative to average the misperception scores *within* each belief composite, and then aggregate across each composite instead of each item. We do this for all analyses in the main text, except for the first aggregated mean difference score as noted above.

Below, we now report the main misperception effect using this latter measure, which averages within each belief composite first. The results are very similar.

Overall, participants overestimated the extremity of their co-partisans. Averaging across all **composites**, there was a sample-wide misperception of **.37 points** (**Cohen’s *d* = .43**; ***t*[845] = 12.4, *p* < .001**). **Sixty-six** percent of participants overestimated the extremity of their average co-partisan. Moreover, what the typical partisan estimated as the average opinion of their party actually represented someone at the **68th** percentile.

We also ran the same test using an intercept-only linear regression model predicting average misperception scores (where misperceptions are calculated for each item), instead of a paired t-test between all first-order and second-order beliefs. A significant, positive intercept value would suggest that there is an average over-estimate among co-partisans. Indeed, we found that the intercept was significantly different from zero (*b0* = .38, *se* = .03, *p* < .001). Finally, we tested the same model using a multilevel mixed-effects model, treating each topic as a repeated measure nested within participant, and we found the same effect (*b0* = .38, *p* < .001).

**Supplementary Analysis B**

Our pre-registration specified two versions of our primary misperception test: a t-test between the first-order beliefs and the second-order beliefs (reported in the main text), and an intercept-only linear regression model predicting the average misperception scores from 1. We report the latter test here, which yielded convergent results. Recall that a significant, positive intercept value would suggest that there is an average over-estimate among co-partisans. Indeed, we found that the intercept was significantly different from zero (*b0* = .25, *se* = .02, *p* < .001).

Below we also report additional tests of the misperception effect using a slightly different measure, similar to Supplementary Analysis A. Aligned with Study 1b’s pre-registration, we calculated our main misperception effect by calculating a misperception score for each of the 15 items we measured and aggregating across that. However, we believe that it is more representative and conservative to average scores *within* each belief composite, and then aggregate across each composite. We do this for all analyses in the main text, except for the first main misperception score (as noted above), which we now do below:

Overall, participants overestimated the extremity of their co-partisans. Averaging across all **composites**, there was a sample-wide misperception of **.27 points** (**Cohen’s *d* = .39**; ***t*[845] = 13.1, *p* < .001**). The regression model, predicting the average misperception score across all composites from the intercept only, yields the same results (b0 = .27, *se* = .02, *p* < .001). **Sixty-six** percent of participants overestimated the extremity of their average co-partisan. Moreover, what the typical partisan estimated as the average opinion of their party actually represented someone at the **64th** percentile.

**Figures**

**Figure S1. Example intervention for a Republican participant, Study 3.**


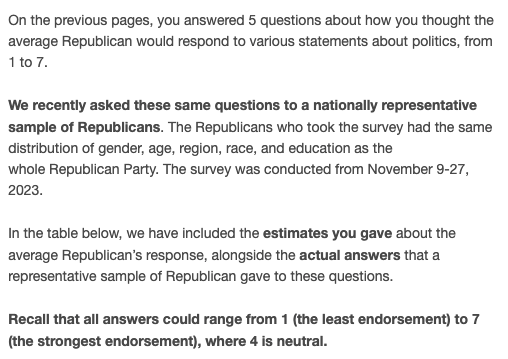


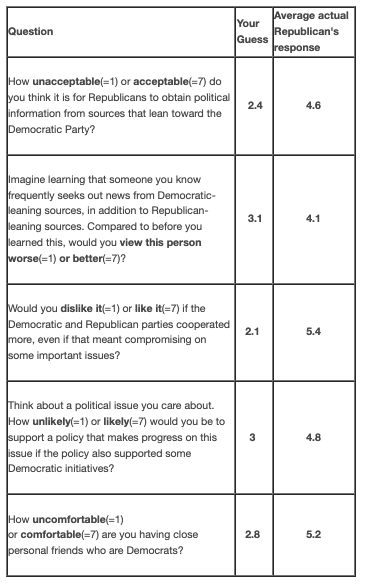


**Tables S1 to S7**

**Table S1. Republicans’ attitudes and misperceptions, Study 1a-Study 1b.**

| Republicans | | | | | | | | |
| --- | --- | --- | --- | --- | --- | --- | --- | --- |
| Belief category | Study 1a | | | | Study 1b | | | |
| Mean1st-order (SD) | Mean2nd-order  (SD) | Cohen’s *d* | True percentile of M2nd-order | Mean1st-order (SD) | Mean2nd-order  (SD) | Cohen’s *d* | True percentile of M2nd-order |
| Political intolerance | 3.25 (1.08) | 4.01 (1.0) | .67 | 76th | 3.20  (1.01) | 3.99  (1.01 | .74 | 78th |
| Subversive tactics | 2.18  (1.36) | 2.61 (1.35) | .34 | 62nd | 2.13  (1.19) | 2.40  (1.27) | *.*23 | 59th |
| Restricting out-party speech | 3.22  (1.78) | 3.63  (1.68) | .26 | 59th | 3.93  (1.84) | 4.04  (1.70) | *N.s.* | 52nd (*n.s.*) |
| Policy extremity | 4.73  (1.36) | 5.17  (1.12) | .35 | 63rd | 4.59 (1.14) | 4.89 (1.10) | .17 | 60th |
| Means and standard deviations of first- and second-order beliefs across each belief category. All mean differences between first- and second-order beliefs are statistically significantly different, except restricting out-party speech in study 1b. Cohen's *d* values quantify the effect size of the misperception. The true percentile indicates the actual percentile of the second-order mean, i.e., the viewpoint extremity that participants guessed was the average. *N.s.* means not significant. | | | | | | | | |

**Table S2. Democrats’ attitudes and misperceptions, Study 1a-Study 1b.**

| Democrats | | | | | | | | |
| --- | --- | --- | --- | --- | --- | --- | --- | --- |
| Belief category | Study 1a | | | | Study 1b | | | |
| Mean1st-order (SD) | Mean2nd-order  (SD) | Cohen’s *d* | True percentile of M2nd-order | Mean1st-order (SD) | Mean2nd-order  (SD) | Cohen’s *d* | True percentile of M2nd-order |
| Political intolerance | 3.47 (1.09) | 3.90 (.85) | .39 | 65th | 3.20  (.97) | 3.88  (.97) | .70 | 76th |
| Subversive tactics | 1.89  (1.08) | 2.29 (1.12) | .36 | 64th | 2.04  (1.21) | 2.13  (1.17) | *.*10 | 53rd |
| Restricting out-party speech | 3.68  (1.77) | 4.06  (1.63) | .25 | 58th | 4.62  (1.69) | 4.54  (1.63) | *N.s.* | 48th *(n.s.*) |
| Policy extremity | 5.75  (1.03) | 5.61  (.96) | -.14 | 44th | 5.45 (1.10) | 5.42 (1.02) | *N.s.* | 49th (*n.s.)* |
| Means and standard deviations of first- and second-order beliefs across each belief category. All mean differences between first- and second-order beliefs are statistically significantly different, except those marked “n.s.”, meaning not significant – specifically, restricting out-party speech and policy extremity in study 1b. For policy extremity in study 1a, Democrats’ actually showed a small but significant *underestimate* of co-partisan extremity. Cohen's *d* values quantify the effect size of the misperception. The true percentile indicates the actual percentile of the second-order mean, i.e., the viewpoint extremity that participants guessed was the average. | | | | | | | | |

**Table S3. Results of logistic regression predicting self-silencing from first- and second-order attitude extremity (alternative analysis approach specified in pre-registration), from Study 4.**

|  | *DV:*  Self-silencing (Share = 0, Withhold = 1) |
| --- | --- |
| Second-order beliefs | OR = 1.21 * |
| First-order beliefs | OR = .91 |
| Intercept | OR = .31 ** |
| Note: **p < .01,* **p < .01, ****p* < .001 | |

**Table S4. Results of linear regression predicting self-silencing from first- and second-order attitude extremity (alternative analysis approach specified in pre-registration), Study 4.**

|  | *DV:*  Self-silencing (likelihood from 1-7) |
| --- | --- |
| Second-order beliefs | .16 ***  (.06) |
| First-order beliefs | -.06  (.06) |
| Intercept | 2.83 ***  (.29) |
| Observations | 1,512 |
| R2 | .004 |
| Adjusted R2 | .003 |
| Residual Std. Error | 1.7 (df: 1509) |
| F Statistic | 3.4 * (df: 2, 1509) |
| Note: **p < .01,* **p < .01, ****p* < .001 | |

**Table S5. Results of logistic regression predicting self-silencing from perceived difference between co-partisan and self (alternative analysis approach specified in pre-registration), from Study 4.**

|  | *DV:*  Self-silencing (Share = 0, Withhold = 1) |
| --- | --- |
| Perceived difference  (between ingroup and self) | OR = 1.21 * |
| Intercept | OR = .48 *** |
| Note: **p < .01,* **p < .01, ****p* < .001 | |

**Table S6. Results of linear regression predicting self-silencing from perceived difference between co-partisan and self (alternative analysis approach specified in pre-registration), from Study 4.**

|  | *DV:*  Self-silencing (likelihood from 1-7) |
| --- | --- |
| Perceived difference  (between ingroup and self) | .11 †  (.06) |
| Intercept | 3.22 ***  (.05) |
| Observations | 1,512 |
| R2 | .002 |
| Adjusted R2 | .002 |
| Residual Std. Error | 1.7 (df: 1510) |
| F Statistic | 3.3 † (df: 1, 1510) |
| Note: †*p* < .1, **p < .01,* **p < .01, ****p* < .001 | |

**Table S7. Summary of results from seven bivariate logistic regressions, predicting self-silencing from second-order beliefs and each of seven significant covariates.**

|  |  | *Outcome variable* |
| --- | --- | --- |
| *Control variable* | *Predictor variable* | Self-silencing  (Share = 0, Withhold = 1) |
| Second-order beliefs | **Second-order beliefs** | OR = 1.21 * |
| Partisan strength | *OR* = 1.19 * |
| News consumption | *OR* = 1.18 * |
| Agreeableness | *OR* = 1.17 * |
| Extraversion | *OR* = 1.18 * |
| Neuroticism | *OR* = 1.15 † |
| Conscientiousness | *OR* = 1.19 * |
| Note: †*p* < .1, **p < .01,* **p < .01, ****p* < .001 | | |

1. During analysis, the anchors were re-coded so that larger numbers indicated greater party/ideologically-aligned extremity. Specifically, the items about immigration, abortion, and terrorism were reverse-scored for Republicans, and the items about gun control, climate change, and healthcare were reverse-scored for Democrats. [↑](#footnote-ref-1)
2. We used exact wording from the ANES for most of these items, in order to use as neutral and standardized framing as possible, and to facilitate comparison with national benchmarks. [↑](#footnote-ref-2)
3. Participants were randomly assigned to either the public or private condition. If assigned to the public condition, participants were defaulted into the social media version, *unless* they responded to an earlier survey question that they had never posted on social media, in which case they saw the neighbors & coworkers version. We did this so that our design would not artificially inflate choices to self-silence because many participants never post on social media at all. Equal numbers of participants in the public condition ultimately saw each scenario (Nsocialmedia = 392; Nneighbors = 372), and the effect of perceived co-partisan extremity on self-silencing was not moderated by which variant of the public condition participants saw (*p* = .54) [↑](#footnote-ref-3)
4. Participants were randomly assigned to either the public or private condition. If assigned to the public condition, participants were defaulted into the social media version, *unless* they responded to an earlier survey question that they had never posted on social media, in which case they saw the neighbors & coworkers version. We did this so that our design would not artificially inflate choices to self-silence, simply because many participants never post on social media, whether about politics or not. Equal numbers of participants in the public condition ultimately saw each scenario (Nsocialmedia = 392; Nneighbors = 372). [↑](#footnote-ref-4)
5. Our key affect measure. [↑](#footnote-ref-5)
6. Our force-choice self-silencing measure. [↑](#footnote-ref-6)
7. Our continuous self-silencing measure. [↑](#footnote-ref-7)
8. Our key meta-perception measure. [↑](#footnote-ref-8)
